# Supplementary material for: Quantification of 15 Antibiotics Widely Used in the Critical Care Unit with a LC-MS/MS System: An Easy Method to Perform a Daily Therapeutic Drug Monitoring
Source: MDPI journal article supplement (doi:10.3390/ph14121214), 2021-11-24
Supplement: s1 [file s1]

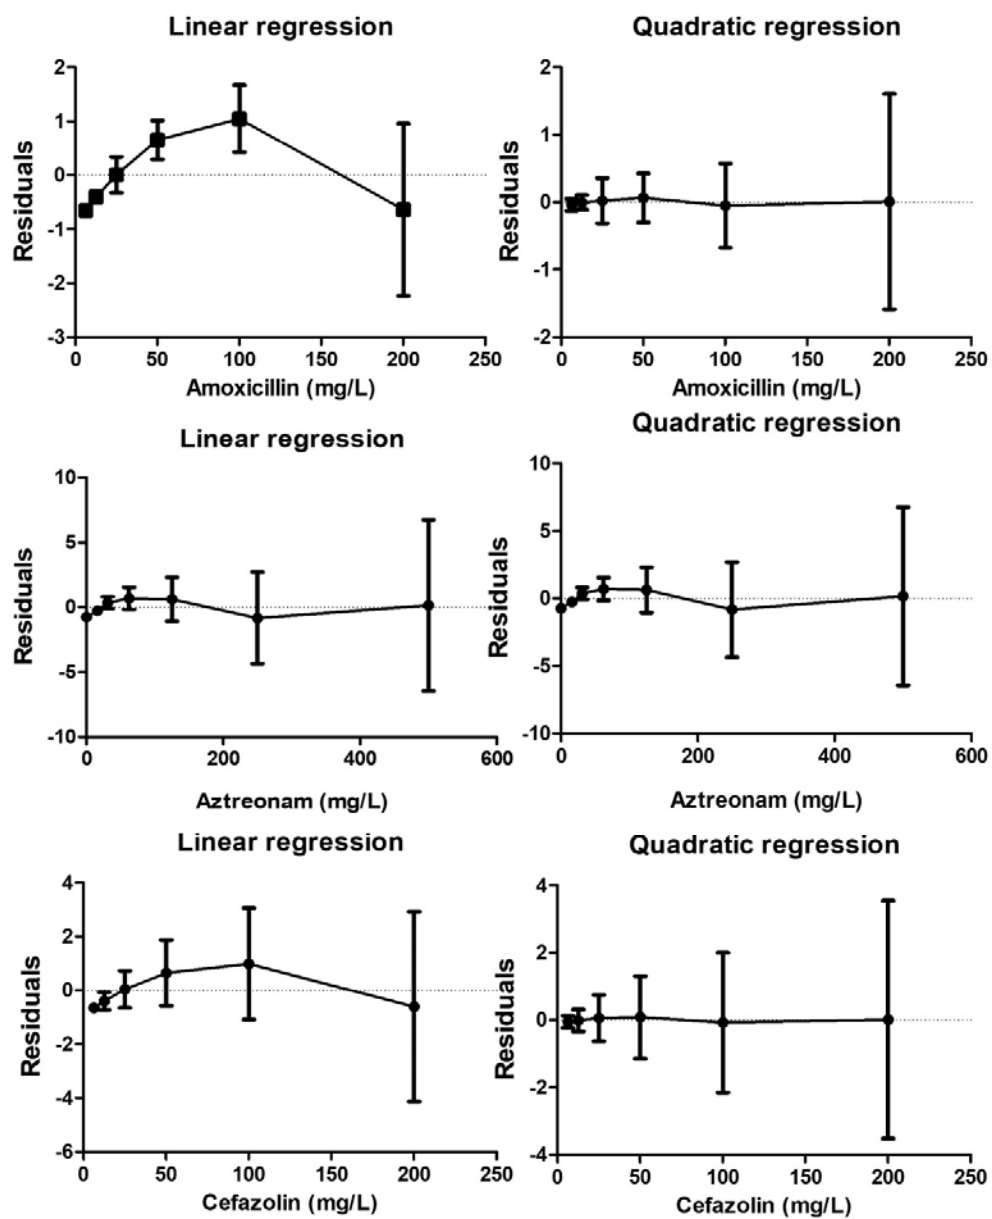

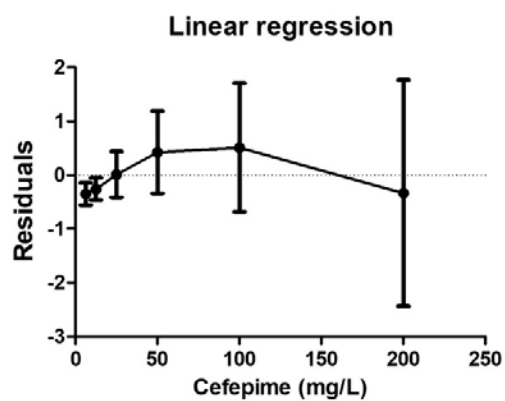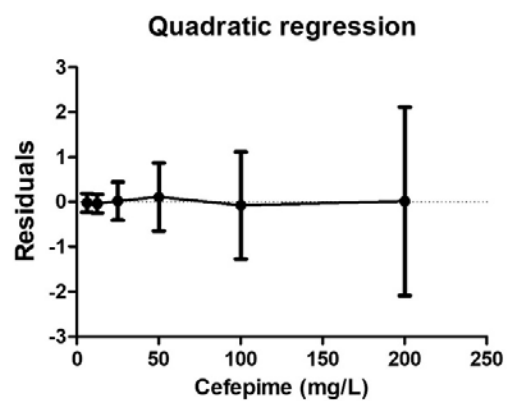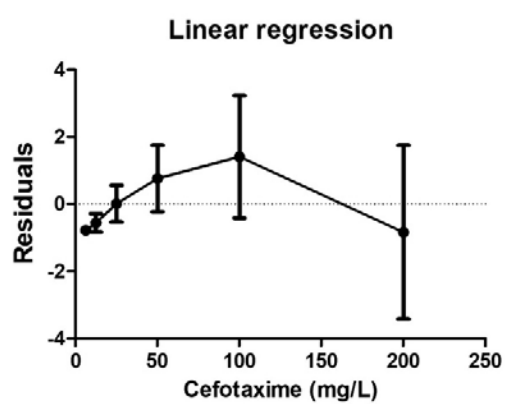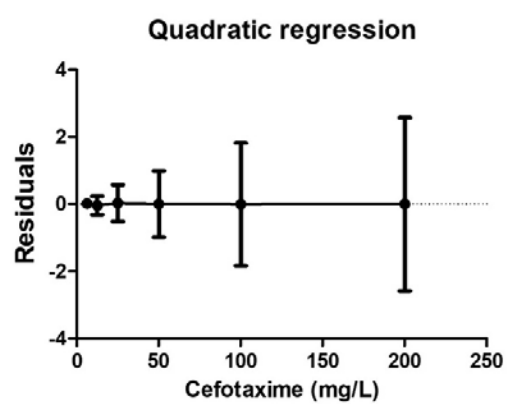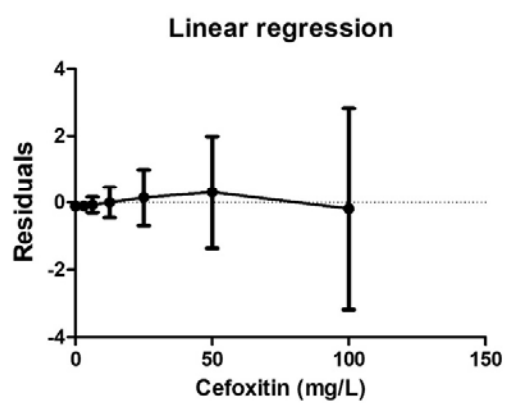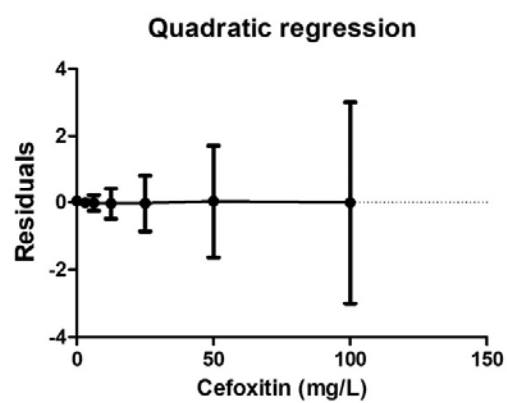

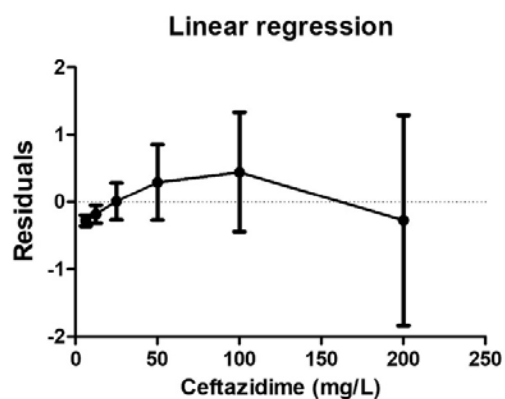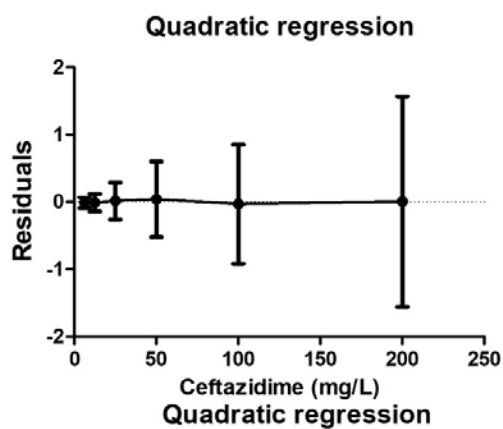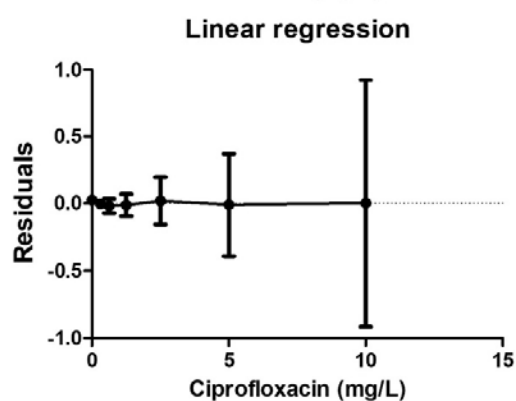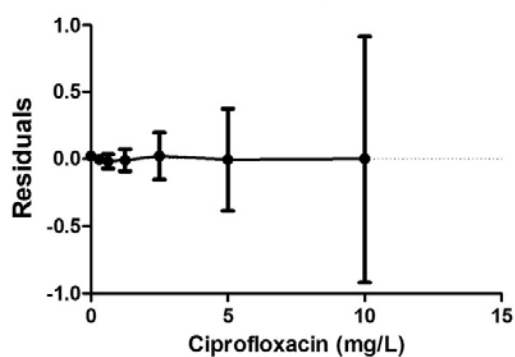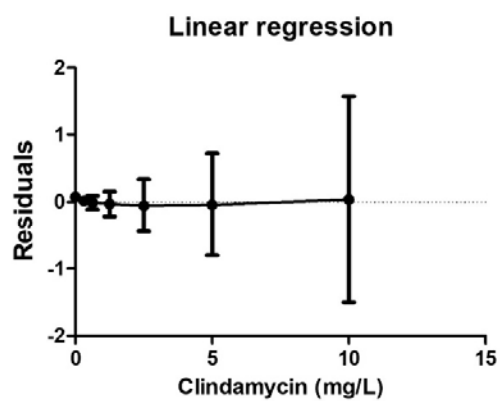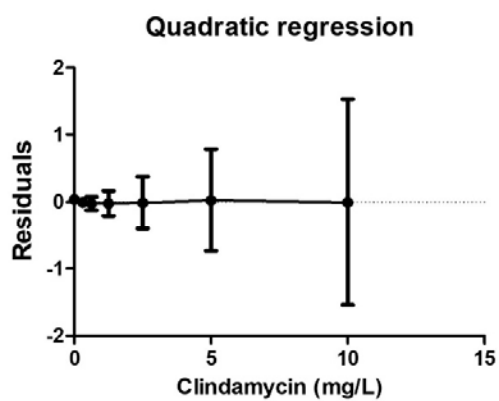

Figure S1 : Residual distribution ( $y_{\text{observed}} - y_{\text{theoretical}}$  as function of different concentration level) with linear or quadratic regression for each compound. Data are expressed as mean  $\pm$  standard deviation (n=6)

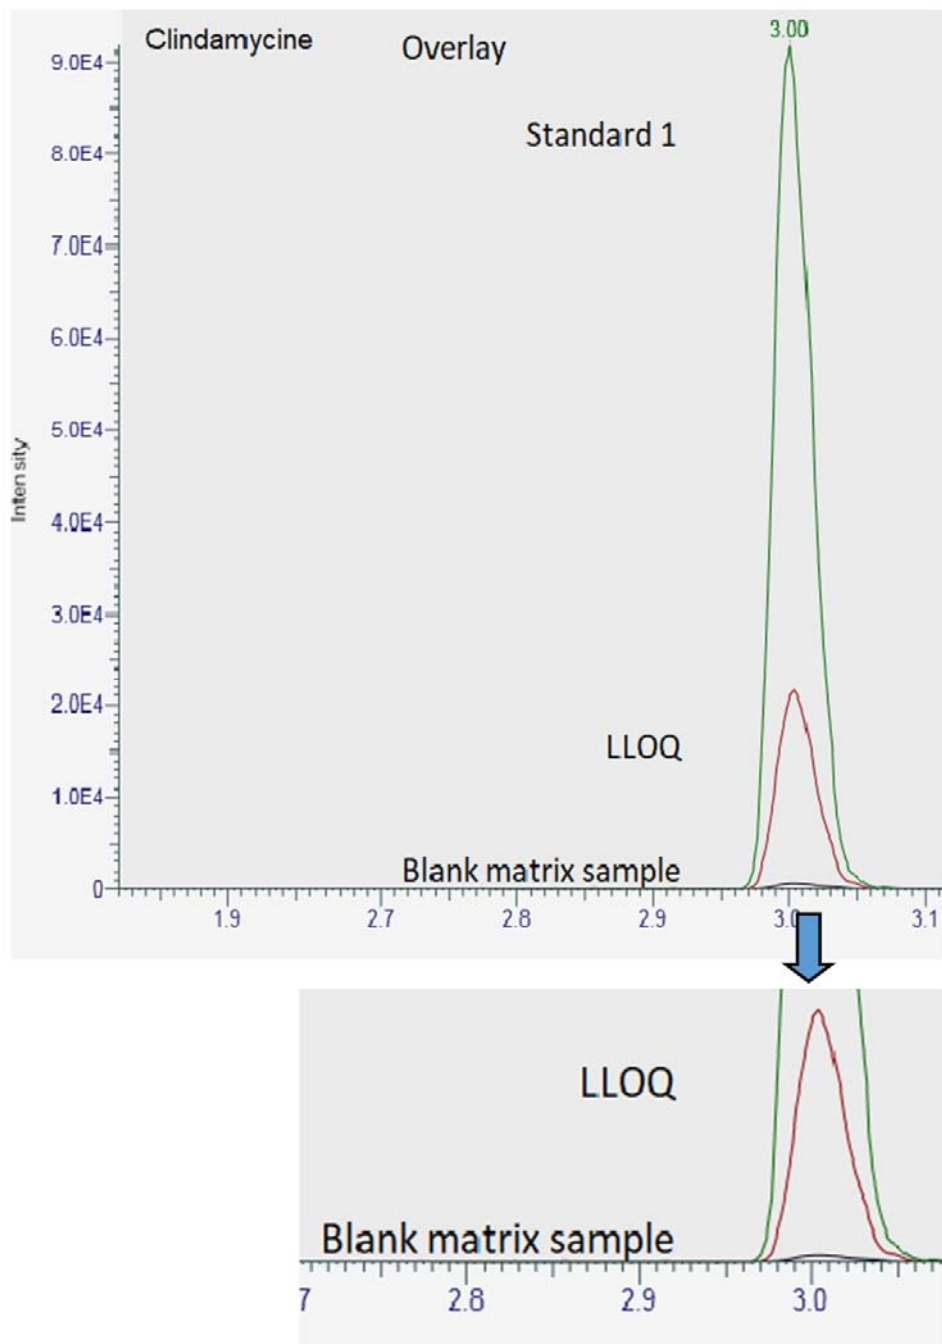

Figure S2: Focus on overlay (LLOQ and matrix blank): example of ertapenem and clindamycin

Table S1: Bias on 3 levels of quality controls for two regression models (linear and quadratic regression, n= 6).

|               | QC low bias (%)   |                      | QC medium bias (%) |                      | QC high bias (%)  |                      |
|---------------|-------------------|----------------------|--------------------|----------------------|-------------------|----------------------|
|               | Linear regression | Quadratic regression | Linear regression  | Quadratic regression | Linear regression | Quadratic regression |
| Amoxicillin   | 11.61             | 4.75                 | 13.23              | 8.57                 | 9.07              | 9.26                 |
| Aztreonam     | -10.55            | -10.17               | -12.04             | -9.46                | -17.59            | -15.06               |
| Cefazolin     | 19.98             | 3.66                 | 5.36               | 2.28                 | 11.79             | 11.66                |
| Cefepime      | 22.81             | 11.26                | 31.93              | 19.33                | 18.19             | 14.19                |
| Cefotaxime    | 22.61             | 3.38                 | 11.88              | 0.40                 | 3.28              | 0.11                 |
| Cefoxitin     | 9.99              | -6.37                | 6.58               | -4.30                | -2.73             | -1.74                |
| Ceftazidime   | 16.34             | 5.28                 | 14.59              | 4.89                 | 10.73             | 10.66                |
| Ciprofloxacin | -5.17             | -3.62                | 2.01               | 1.14                 | 5.68              | 6.24                 |
| Clindamycin   | -3.35             | -3.37                | -10.46             | -8.31                | -1.50             | -1.23                |
| Daptomycin    | -10.73            | -8.28                | -12.78             | -10.21               | -13.91            | -12.81               |
| Ertapenem     | 8.45              | 6.54                 | 13.37              | 11.71                | 8.44              | 8.23                 |
| Linezolid     | 6.52              | 3.54                 | 4.62               | 2.83                 | 6.21              | 5.01                 |
| Meropenem     | 15.85             | 10.43                | 15.53              | 11.86                | 14.66             | 10.02                |
| Ofloxacin     | -10.08            | -9.62                | -14.61             | -10.61               | 0.80              | 0.74                 |
| Piperacillin  | -11.45            | -7.90                | -9.66              | -7.35                | -9.78             | -9.38                |

Table S2: Goodness-of-fit analysis. R<sup>2</sup> and Absolute Sum of square were calculated for two models of regression of the calibration curve (linear and quadratic regression, n =6).

|               | Linear regression |                        | Quadratic regression |                        |
|---------------|-------------------|------------------------|----------------------|------------------------|
|               | R <sup>2</sup>    | Absolute Sum of square | R <sup>2</sup>       | Absolute Sum of square |
| Amoxicillin   | 0.9977            | 42.58                  | 0.9988               | 22.46                  |
| Aztreonam     | 0.9956            | 380.50                 | 0.9957               | 375.8                  |
| Cefazolin     | 0.9625            | 151.10                 | 0.9671               | 132.5                  |
| Cefepime      | 0.9700            | 52.92                  | 0.9733               | 47.13                  |
| Cefotaxime    | 0.9819            | 97.10                  | 0.9873               | 67.99                  |
| Cefoxitin     | 0.9571            | 77.99                  | 0.9578               | 76.78                  |
| Ceftazidime   | 0.9755            | 29.32                  | 0.9786               | 25.57                  |
| Ciprofloxacin | 0.9954            | 7.20                   | 0.9954               | 7.20                   |
| Clindamycin   | 0.9861            | 18.97                  | 0.9862               | 18.90                  |
| Daptomycin    | 0.9299            | 85.52                  | 0.9307               | 84.53                  |
| Ertapenem     | 0.9676            | 276.70                 | 0.9682               | 271.6                  |
| Linezolid     | 0.9976            | 3.73                   | 0.9976               | 3.73                   |
| Meropenem     | 0.9649            | 88.46                  | 0.9649               | 88.42                  |
| Ofloxacin     | 0.9942            | 1.44                   | 0.9945               | 1.37                   |

|              |        |       |        |       |
|--------------|--------|-------|--------|-------|
| Piperacillin | 0.9935 | 202.3 | 0.9936 | 200.5 |
|--------------|--------|-------|--------|-------|

Table S3: Matrix effect in 6 different blank plasma samples at two concentrations for each compound (3-fold- LLOQ and 80 % of ULOQ). RSD: relative standard deviation

|               | 3-fold- LLOQ  |         |                             |         | 80 % ULOQ     |         |                             |         |
|---------------|---------------|---------|-----------------------------|---------|---------------|---------|-----------------------------|---------|
|               | Matrix factor |         | IS normalised matrix factor |         | Matrix factor |         | IS normalised matrix factor |         |
|               | Mean (AU)     | RSD (%) | Mean (AU)                   | RSD (%) | Mean (AU)     | RSD (%) | Mean (AU)                   | RSD (%) |
| Amoxicillin   | 0.72          | 11.9    | 0.88                        | 9.7     | 0.92          | 2.6     | 1.0                         | 2.7     |
| Aztreonam     | 0.95          | 3.8     | 0.99                        | 3.1     | 0.93          | 1.4     | 0.93                        | 2.2     |
| Cefazolin     | 0.73          | 14.8    | 0.86                        | 11.3    | 0.92          | 2.5     | 1.04                        | 1.0     |
| Cefepime      | 0.74          | 14.4    | 0.88                        | 10.5    | 0.91          | 3.2     | 0.99                        | 0.9     |
| Cefotaxime    | 0.95          | 3.7     | 0.99                        | 1.3     | 0.91          | 1.7     | 0.98                        | 2.1     |
| Cefoxitin     | 0.72          | 10.1    | 0.85                        | 6.8     | 0.83          | 5.67    | 0.95                        | 5.35    |
| Ceftazidime   | 0.76          | 14.7    | 0.85                        | 11.8    | 0.92          | 2.21    | 1.05                        | 2.60    |
| Ciprofloxacin | 1.14          | 5.7     | 1.04                        | 4.5     | 0.98          | 1.51    | 1.07                        | 2.15    |
| Clindamycin   | 0.96          | 4.6     | 1.02                        | 2.8     | 0.92          | 0.6     | 0.98                        | 1.7     |
| Daptomycin    | 0.90          | 4.0     | 0.96                        | 3.1     | 0.88          | 1.0     | 0.94                        | 2.6     |
| Ertapenem     | 0.75          | 11.4    | 0.86                        | 10.8    | 0.93          | 3.76    | 1.03                        | 2.8     |
| Linezolid     | 0.81          | 10.8    | 1.0                         | 2.4     | 0.84          | 6.12    | 0.97                        | 2.7     |
| Meropenem     | 0.72          | 11.8    | 0.82                        | 10.1    | 0.93          | 2.46    | 1.03                        | 2.2     |
| Ofloxacin     | 0.95          | 14.2    | 1.11                        | 11.1    | 0.96          | 1.63    | 1.09                        | 3.44    |
| Piperacillin  | 1.01          | 5.5     | 1.05                        | 3.4     | 0.96          | 1.7     | 0.98                        | 3.4     |

Table S4: Stability assays : Evolution over 5 days of the working solutions kept at +4°C and post-preparative stability results. Data are expressed as mean and RSD.

| Stability of Standard solutions and IS solutions        |                                                                                                                       |                       |
|---------------------------------------------------------|-----------------------------------------------------------------------------------------------------------------------|-----------------------|
| Compounds                                               | Mean of Areas under the curve of standard 6 (n=5, day 1 to day 5)                                                     | RSD (%)               |
| Amoxicillin                                             | 27451628                                                                                                              | 6.6                   |
| Aztreonam                                               | 23458505                                                                                                              | 5.8                   |
| Cefazolin                                               | 13842996                                                                                                              | 7.1                   |
| Cefepime                                                | 9133927                                                                                                               | 7.5                   |
| Cefotaxime                                              | 6824045                                                                                                               | 6.1                   |
| Cefoxitin                                               | 9394058                                                                                                               | 11.2                  |
| Ceftazidime                                             | 7469856                                                                                                               | 8.8                   |
| Ciprofloxacin                                           | 4924375                                                                                                               | 10.3                  |
| Clindamycin                                             | 5990753                                                                                                               | 6.4                   |
| Daptomycin                                              | 5933826                                                                                                               | 3.9                   |
| Ertapenem                                               | 14321930                                                                                                              | 11.3                  |
| Linezolid                                               | 12285472                                                                                                              | 7.0                   |
| Meropenem                                               | 7858607                                                                                                               | 8.7                   |
| Ofloxacin                                               | 7980404                                                                                                               | 8.3                   |
| Piperacillin                                            | 15262691                                                                                                              | 7.1                   |
| Amoxicillin-D <sub>4</sub>                              | 472857                                                                                                                | 6.4                   |
| Cefazolin- <sup>13</sup> C <sub>2</sub> <sup>15</sup> N | 545067                                                                                                                | 10.0                  |
| Cefotaxime-D <sub>3</sub>                               | 197816                                                                                                                | 9.3                   |
| Ciprofloxacin-D <sub>8</sub>                            | 470039                                                                                                                | 11.2                  |
| Meropenem-D <sub>6</sub>                                | 407526                                                                                                                | 14.4                  |
| Linezolid-D <sub>3</sub>                                | 800445                                                                                                                | 7.5                   |
| Meropenem-D <sub>6</sub>                                | 954139                                                                                                                | 9.3                   |
| Ofloxacin-D <sub>8</sub>                                | 192074                                                                                                                | 7.0                   |
| Piperacillin-D <sub>5</sub>                             | 27451628                                                                                                              | 6.6                   |
| Post-preparative stability                              |                                                                                                                       |                       |
| Compounds                                               | Mean ratios of the area under the curve (H0) to area under the curve (H24) normalized by the internal standards (n=6) | RSD (%)               |
| Amoxicillin                                             | 0.98                                                                                                                  | 1.5                   |
| Aztreonam                                               | 0.92                                                                                                                  | 1.9                   |
| Cefazolin                                               | 1.00                                                                                                                  | 2.3                   |
| Cefepime                                                | 0.92                                                                                                                  | 3.8                   |
| Cefotaxime                                              | 0.97                                                                                                                  | 3.0                   |
| Cefoxitin                                               | 1.05                                                                                                                  | 2.1                   |
| Ceftazidime                                             | 0.96                                                                                                                  | 2.8                   |
| Ciprofloxacin                                           | 0.99                                                                                                                  | 4.3                   |
| Clindamycin                                             | 0.93                                                                                                                  | 3.4                   |
| Daptomycin                                              | 1.0                                                                                                                   | 4.8                   |
| Ertapenem                                               | 1.55 (H24) – 1.01 (H3)                                                                                                | 10.5 (H24) – 2.8 (H3) |
| Linezolid                                               | 0.97                                                                                                                  | 1.0                   |
| Meropenem                                               | 1.00                                                                                                                  | 5.2                   |
| Ofloxacin                                               | 0.98                                                                                                                  | 1.8                   |
| Piperacillin                                            | 0.97                                                                                                                  | 2.1                   |

Table S5: Target concentrations of quality control

|               | Target QC low<br>(mg/L) | Target QC medium<br>(mg/L) | Target QC high<br>(mg/L) |
|---------------|-------------------------|----------------------------|--------------------------|
| Amoxicillin   | 31.06                   | 62.77                      | 126.51                   |
| Aztreonam     | 88.21                   | 176.94                     | 369.77                   |
| Cefazolin     | 37.91                   | 76.89                      | 152.11                   |
| Cefepime      | 26.47                   | 51.38                      | 109.51                   |
| Cefotaxime    | 37.33                   | 75.59                      | 155.85                   |
| Cefoxitin     | 17.05                   | 35.59                      | 71.93                    |
| Ceftazidime   | 32.91                   | 68.17                      | 136.58                   |
| Ciprofloxacin | 1.69                    | 3.40                       | 6.88                     |
| Clindamycin   | 1.78                    | 3.73                       | 7.34                     |
| Daptomycin    | 20.79                   | 42.45                      | 85.57                    |
| Ertapenem     | 17.10                   | 33.75                      | 65.84                    |
| Linezolid     | 9.05                    | 18.39                      | 37.67                    |
| Meropenem     | 14.98                   | 30.35                      | 71.01                    |
| Ofloxacin     | 1.79                    | 3.60                       | 7.26                     |
| Piperacillin  | 37.21                   | 77.19                      | 161.91                   |

Table S6 : Mathematical equation for the accuracy and relative standard deviation

|                             |                                                                                                                |
|-----------------------------|----------------------------------------------------------------------------------------------------------------|
| Accuracy                    | $\frac{(\text{measured concentration} - \text{target concentration})}{\text{target concentration}} \times 100$ |
| Relative standard deviation | $\frac{\text{standard deviation}}{\text{mean}} \times 100$                                                     |
